# Supplementary material
Source: PubMed Central journal article supplement (PMC4489933)
Supplement: NIHMS703085-supplement-Supporting_Information.pdf [file NIHMS703085-supplement-Supporting_Information.pdf]

# Supporting Information: Is Ring Breaking Feasible in Relative Binding Free Energy Calculations?

Shuai Liu,<sup>†</sup> Lingle Wang,<sup>‡</sup> and David L. Mobley<sup>\*,†</sup>

*Department of Pharmaceutical Sciences*

*and Department of Chemistry*

*147 Bison Modular*

*University of California, Irvine*

*Irvine, CA 92697*

*, and Schrödinger Inc*

*120 West 45th Street*

*New York, NY, 10036*

E-mail: [dmobley@mobleylab.org](mailto:dmobley@mobleylab.org)

March 31, 2015

## Abstract

---

\*To whom correspondence should be addressed

<sup>†</sup>Department of Pharmaceutical Sciences  
and Department of Chemistry  
147 Bison Modular  
University of California, Irvine  
Irvine, CA 92697

<sup>‡</sup>Schrödinger Inc  
120 West 45th Street  
New York, NY, 10036

This provides an overview of the Supporting Information supplementary files for the associated paper, and details of testing the real bond length changes.

## 1 Supporting information about $\lambda$ spacing

In the absolute calculations,  $\lambda_{chg} = [0.0\ 0.25\ 0.5\ 0.75\ 1.0\ 1.0\ 1.0\ 1.0\ 1.0\ 1.0\ 1.0\ 1.0\ 1.0\ 1.0\ 1.0\ 1.0\ 1.0\ 1.0\ 1.0\ 1.0]$ ,  $\lambda_{bd} = [0.0\ 0.05\ 0.10\ 0.15\ 0.21\ 0.26\ 0.32\ 0.37\ 0.42\ 0.47\ 0.53\ 0.58\ 0.63\ 0.68\ 0.74\ 0.79\ 0.84\ 0.89\ 0.95\ 1.0]$  and  $\lambda_{LJ} = [0.0\ 0.00\ 0.0\ 0.00\ 0.0\ 0.05\ 0.1\ 0.2\ 0.3\ 0.4\ 0.5\ 0.6\ 0.65\ 0.7\ 0.75\ 0.8\ 0.85\ 0.9\ 0.95\ 1.0]$ . In GROMACS, a thermodynamic state is specified by a corresponding vector in  $\lambda$  space – in our case, the values of each of these three  $\lambda$  values. Here, in our relative calculations, partial charges are first turned off and then LJ interactions are turned off after the charge modification is complete; strain is added throughout this process. In the absolute case, state 0 corresponds to the molecule in water with no strain, while state 1 corresponds to the molecule “bound” (that is, in the gas phase with internal strain induced by the special bond).

For the relative calculations we found that the free energy difference between  $\lambda_3$  and  $\lambda_4$  is large. So four additional  $\lambda$  values were added, resulting in  $\lambda_{chg} = [0.0\ 0.25\ 0.5\ 0.75\ 0.80\ 0.85\ 0.90\ 0.95\ 1.0\ 1.00\ 1.0\ 1.0\ 1.0\ 1.0\ 1.0\ 1.0\ 1.0\ 1.0\ 1.0\ 1.0\ 1.0]$ ,  $\lambda_{bd} = [0.0\ 0.00\ 0.0\ 0.00\ 0.0\ 0.0\ 0.0\ 0.0\ 0.0\ 0.0\ 0.0\ 0.0\ 0.0\ 0.0\ 0.0\ 0.0\ 0.0\ 0.0\ 0.0\ 0.0]$ , and  $\lambda_{LJ} = [0.0\ 0.00\ 0.0\ 0.00\ 0.0\ 0.0\ 0.0\ 0.0\ 0.0\ 0.0\ 0.0\ 0.0\ 0.0\ 0.0\ 0.0\ 0.0\ 0.0\ 0.0\ 0.0\ 0.0]$ .

## 2 Supporting Figures

## 3 Supporting Tables

## 4 Files

Additional supporting files in the form of topology and coordinate files as well as a README file are available online via ACS. Additionally, trajectory files for the real protein-ligand systems

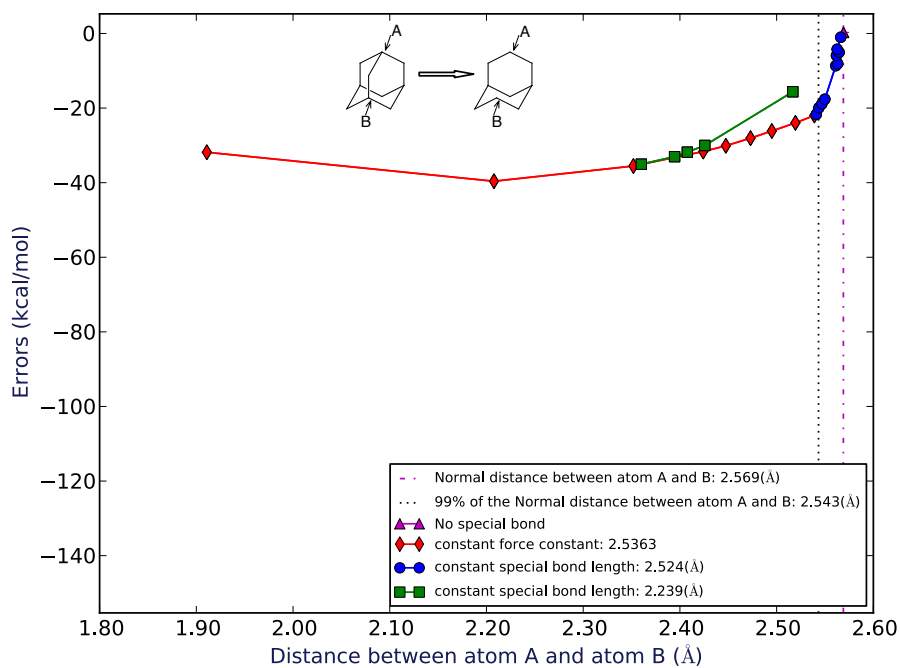

Figure S1: Errors for mutating adamantane to bicyclo[3.3.1]nonane as a function of the average distance between the shared atoms observed in the simulations. This error is for the system of adamantane-bicyclononane without NDE. The "original" distance is the distance between atom A and atom B in the relative free energy calculation from adamantane to bicyclo[3.3.1]nonane in vacuum without any special bond restrains. Spots in different colors represent different force constants/bond length groups of the special bond.

examined are available via the web at [www.escholarship.org/uc/item/27d9s5j9](http://www.escholarship.org/uc/item/27d9s5j9).

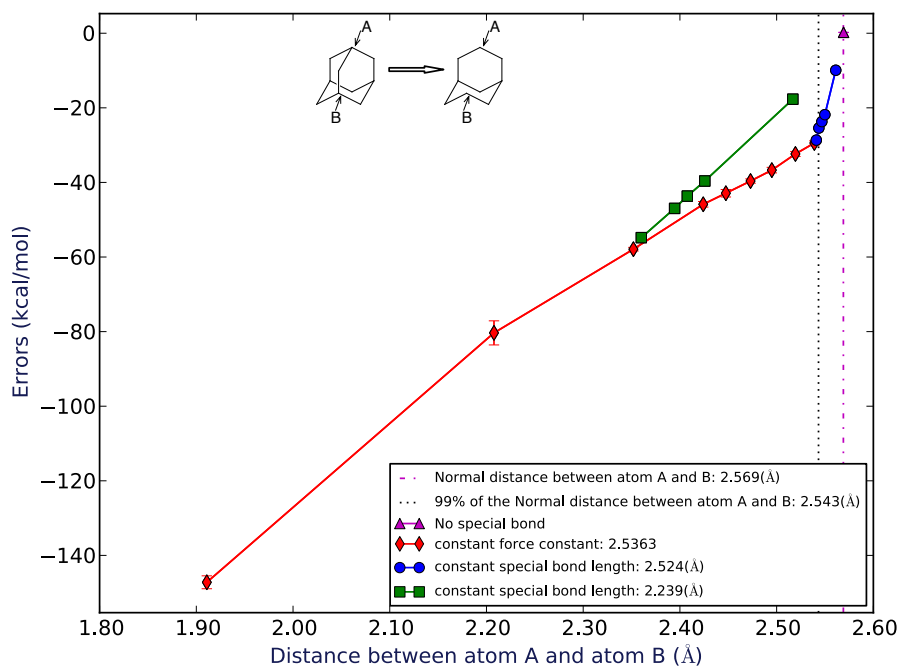

Figure S2: Errors for mutating adamantane to bicyclo[3.3.1]nonane as a function of the average distance between the shared atoms observed in the simulations. This error is for the system of adamantane-bicyclononane with NDE. The "original" distance is the distance between atom A and atom B in the relative free energy calculation from adamantane to bicyclo[3.3.1]nonane in vacuum without any special bond restrains. Spots in different colors represent different force constants/bond length groups of the special bond.

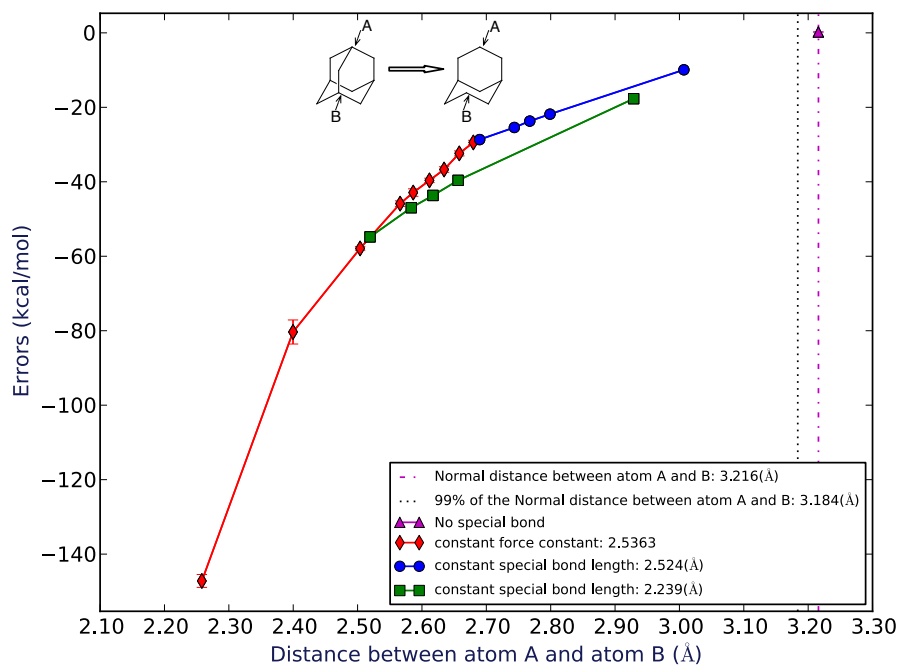

Figure S3: Errors for mutating adamantane to bicyclo[3.3.1]nonane as a function of the average distance between the shared atoms observed in the simulations. This error is for the system of adamantane-bicyclononane with NDE. The "original" distance is the distance between atom A and atom B in the absolute free energy calculation of bicyclo[3.3.1]nonane without any special bond restrains. Spots in different colors represent different force constants/bond length groups of the special bond.

Table S1: Errors as a function of bond length (strain) for adamantane-bicyclononane, using distances observed in the relative vacuum simulation starting from adamantane for measuring the bond length. The corresponding error figure for this table is S1

| ID       | Special bond length (Å) | Force constant( $kJmol^{-1}nm^{-2}$ ) | Distance between atom A and B in simulation(Å) | Errors( $kcal/mol$ ) |
|----------|-------------------------|---------------------------------------|------------------------------------------------|----------------------|
| original | none                    | none                                  | 2.569(1)                                       | $0.29 \pm 0.03$      |
| 0        | 2.524                   | 2.5363                                | 2.5390(8)                                      | $-21.98 \pm 0.10$    |
| 1        | 2.494                   | 2.5363                                | 2.5194(8)                                      | $-23.97 \pm 0.10$    |
| 2        | 2.456                   | 2.5363                                | 2.4950(8)                                      | $-26.16 \pm 0.10$    |
| 3        | 2.421                   | 2.5363                                | 2.4730(8)                                      | $-28.07 \pm 0.10$    |
| 4        | 2.383                   | 2.5363                                | 2.4475(8)                                      | $-30.11 \pm 0.10$    |
| 5        | 2.347                   | 2.5363                                | 2.4241(8)                                      | $-31.65 \pm 0.10$    |
| 6        | 2.239                   | 2.5363                                | 2.3519(8)                                      | $-35.54 \pm 0.10$    |
| 7        | 2.019                   | 2.5363                                | 2.2078(8)                                      | $-39.61 \pm 0.10$    |
| 8        | 1.585                   | 2.5363                                | 1.9109(8)                                      | $-31.85 \pm 0.10$    |
| 11       | 2.524                   | 2.2827                                | 2.5410(8)                                      | $-21.69 \pm 0.08$    |
| 12       | 2.524                   | 1.5218                                | 2.5437(9)                                      | $-19.93 \pm 0.05$    |
| 13       | 2.524                   | 1.2682                                | 2.547(1)                                       | $-18.88 \pm 0.05$    |
| 14       | 2.524                   | 1.0145                                | 2.550(1)                                       | $-17.61 \pm 0.04$    |
| 15       | 2.524                   | 0.2536                                | 2.561(1)                                       | $-8.65 \pm 0.03$     |
| 21       | 2.239                   | 2.2827                                | 2.3601(9)                                      | $-35.04 \pm 0.08$    |
| 22       | 2.239                   | 1.5218                                | 2.394(1)                                       | $-33.02 \pm 0.05$    |
| 23       | 2.239                   | 1.2682                                | 2.408(1)                                       | $-31.82 \pm 0.05$    |
| 24       | 2.239                   | 1.0145                                | 2.426(1)                                       | $-30.03 \pm 0.04$    |
| 25       | 2.239                   | 0.2536                                | 2.517(1)                                       | $-15.63 \pm 0.03$    |

Table S2: Errors as a function of bond length (strain) for system adamantane-bicyclononane with NDE, using distances observed in the relative vacuum simulation starting from adamantane for measuring the bond length. The corresponding error figure for this table is S2

| ID       | Special bond length (Å) | Force constant( $kJmol^{-1}nm^{-2}$ ) | Distance between atom A and B in simulation(Å) | Errors( $kcal/mol$ ) |
|----------|-------------------------|---------------------------------------|------------------------------------------------|----------------------|
| original | none                    | none                                  | 2.569(1)                                       | $0.23 \pm 0.03$      |
| 0        | 2.524                   | 2.5363                                | 2.5390(8)                                      | $-29.44 \pm 0.58$    |
| 1        | 2.494                   | 2.5363                                | 2.5194(8)                                      | $-32.37 \pm 0.67$    |
| 2        | 2.456                   | 2.5363                                | 2.4950(8)                                      | $-36.70 \pm 0.75$    |
| 3        | 2.421                   | 2.5363                                | 2.4730(8)                                      | $-39.63 \pm 0.59$    |
| 4        | 2.383                   | 2.5363                                | 2.4475(8)                                      | $-42.89 \pm 1.01$    |
| 5        | 2.347                   | 2.5363                                | 2.4241(8)                                      | $-45.86 \pm 0.74$    |
| 6        | 2.239                   | 2.5363                                | 2.3519(8)                                      | $-57.90 \pm 0.49$    |
| 7        | 2.019                   | 2.5363                                | 2.2078(8)                                      | $-80.34 \pm 3.23$    |
| 8        | 1.585                   | 2.5363                                | 1.9109(8)                                      | $-147.21 \pm 1.73$   |
| 11       | 2.524                   | 2.2827                                | 2.5410(8)                                      | $-28.66 \pm 0.36$    |
| 12       | 2.524                   | 1.5218                                | 2.5437(9)                                      | $-25.41 \pm 0.08$    |
| 13       | 2.524                   | 1.2682                                | 2.547(1)                                       | $-23.70 \pm 0.06$    |
| 14       | 2.524                   | 1.0145                                | 2.550(1)                                       | $-21.83 \pm 0.05$    |
| 15       | 2.524                   | 0.2536                                | 2.561(1)                                       | $-9.92 \pm 0.03$     |
| 21       | 2.239                   | 2.2827                                | 2.3601(9)                                      | $-54.80 \pm 0.36$    |
| 22       | 2.239                   | 1.5218                                | 2.394(1)                                       | $-46.97 \pm 0.08$    |
| 23       | 2.239                   | 1.2682                                | 2.408(1)                                       | $-43.67 \pm 0.06$    |
| 24       | 2.239                   | 1.0145                                | 2.426(1)                                       | $-39.62 \pm 0.05$    |
| 25       | 2.239                   | 0.2536                                | 2.517(1)                                       | $-17.68 \pm 0.03$    |

Table S3: Errors as a function of bond length (strain) for system adamantane-bicyclononane with NDE, using distances observed in the absolute simulation of bicyclo[3.3.1]nonane for measuring the bond length. The corresponding error figure for this table is S3

| ID       | Special bond length (Å) | Force constant( $kJmol^{-1}nm^{-2}$ ) | Distance between atom A and B in simulation(Å) | Errors( $kcal/mol$ ) |
|----------|-------------------------|---------------------------------------|------------------------------------------------|----------------------|
| original | none                    | none                                  | 3.22(7)                                        | $0.23 \pm 0.03$      |
| 0        | 2.524                   | 2.5363                                | 2.68(3)                                        | $-29.44 \pm 0.58$    |
| 1        | 2.494                   | 2.5363                                | 2.66(3)                                        | $-32.37 \pm 0.67$    |
| 2        | 2.456                   | 2.5363                                | 2.63(2)                                        | $-36.70 \pm 0.75$    |
| 3        | 2.421                   | 2.5363                                | 2.61(3)                                        | $-39.63 \pm 0.59$    |
| 4        | 2.383                   | 2.5363                                | 2.59(3)                                        | $-42.89 \pm 1.01$    |
| 5        | 2.347                   | 2.5363                                | 2.57(2)                                        | $-45.86 \pm 0.74$    |
| 6        | 2.239                   | 2.5363                                | 2.50(2)                                        | $-57.90 \pm 0.49$    |
| 7        | 2.019                   | 2.5363                                | 2.40(2)                                        | $-80.34 \pm 3.23$    |
| 8        | 1.585                   | 2.5363                                | 2.26(2)                                        | $-147.21 \pm 1.73$   |
| 11       | 2.524                   | 2.2827                                | 2.69(3)                                        | $-28.66 \pm 0.36$    |
| 12       | 2.524                   | 1.5218                                | 2.74(3)                                        | $-25.41 \pm 0.08$    |
| 13       | 2.524                   | 1.2682                                | 2.77(4)                                        | $-23.70 \pm 0.06$    |
| 14       | 2.524                   | 1.0145                                | 2.80(4)                                        | $-21.83 \pm 0.05$    |
| 15       | 2.524                   | 0.2536                                | 3.01(5)                                        | $-9.92 \pm 0.03$     |
| 21       | 2.239                   | 2.2827                                | 2.52(2)                                        | $-54.80 \pm 0.36$    |
| 22       | 2.239                   | 1.5218                                | 2.58(3)                                        | $-46.97 \pm 0.08$    |
| 23       | 2.239                   | 1.2682                                | 2.62(3)                                        | $-43.67 \pm 0.06$    |
| 24       | 2.239                   | 1.0145                                | 2.66(3)                                        | $-39.62 \pm 0.05$    |
| 25       | 2.239                   | 0.2536                                | 2.93(5)                                        | $-17.68 \pm 0.03$    |

Table S4: Bond length changes for benzamidine bound to trypsin.

| atom ID 1 | atom ID 2 | bond length in water(Å) | bond length in complex (Å) | z score | percentage |
|-----------|-----------|-------------------------|----------------------------|---------|------------|
| C1        | C3        | 1.3874(4)               | 1.3871(4)                  | 0.6     | 0.0        |
| C6        | C7        | 1.4729(4)               | 1.4729(4)                  | 0.0     | 0.0        |
| C4        | C6        | 1.3891(4)               | 1.3879(4)                  | 2.4     | 0.1        |
| C3        | C5        | 1.3879(4)               | 1.3876(4)                  | 0.6     | 0.0        |
| C2        | C4        | 1.3867(4)               | 1.3877(4)                  | 2.0     | 0.1        |
| C5        | C6        | 1.3870(4)               | 1.3874(4)                  | 0.8     | 0.0        |
| C7        | N2        | 1.3923(4)               | 1.3927(4)                  | 0.7     | 0.0        |
| C7        | N1        | 1.3922(4)               | 1.3928(4)                  | 1.1     | 0.0        |
| C1        | C2        | 1.3874(4)               | 1.3881(4)                  | 1.3     | 0.1        |



Table S5: Bond length changes for p-isopropylbenzamidine bound to trypsin.

| atom ID 1 | atom ID 2 | bond length in water(Å) | bond length in complex (Å) | z score | percentage |
|-----------|-----------|-------------------------|----------------------------|---------|------------|
| C1        | C3        | 1.3874(4)               | 1.3876(4)                  | 0.4     | 0.0        |
| C4        | C6        | 1.3880(4)               | 1.3880(5)                  | 0.0     | 0.0        |
| C2        | C5        | 1.3871(4)               | 1.3870(4)                  | 0.2     | 0.0        |
| C2        | C4        | 1.3873(4)               | 1.3878(4)                  | 1.0     | 0.0        |
| C10       | C9        | 1.5363(5)               | 1.5369(5)                  | 0.9     | 0.0        |
| C10       | C8        | 1.5364(5)               | 1.5363(5)                  | 0.2     | 0.0        |
| C5        | C7        | 1.4722(4)               | 1.4728(4)                  | 1.0     | 0.0        |
| C1        | C5        | 1.3876(4)               | 1.3873(4)                  | 0.6     | 0.0        |
| C7        | N2        | 1.3920(4)               | 1.3930(4)                  | 1.8     | 0.1        |
| C3        | C6        | 1.3875(4)               | 1.3878(4)                  | 0.5     | 0.0        |
| C7        | N1        | 1.3927(4)               | 1.3919(4)                  | 1.5     | 0.1        |
| C10       | C6        | 1.5140(4)               | 1.5140(4)                  | 0.0     | 0.0        |

Table S6: Bond length for benzylammonium bound to trypsin.

| atom ID 1 | atom ID 2 | bond length in water(Å) | bond length in complex (Å) | z score | percentage |
|-----------|-----------|-------------------------|----------------------------|---------|------------|
| C1        | C3        | 1.3874(4)               | 1.3877(4)                  | 0.6     | 0.0        |
| C6        | C7        | 1.5147(5)               | 1.5139(4)                  | 1.3     | 0.1        |
| C4        | C6        | 1.3885(4)               | 1.3878(4)                  | 1.4     | 0.1        |
| C3        | C5        | 1.3881(4)               | 1.3881(4)                  | 0.0     | 0.0        |
| C2        | C4        | 1.3876(4)               | 1.3880(4)                  | 0.8     | 0.0        |
| C5        | C6        | 1.3885(4)               | 1.3883(4)                  | 0.4     | 0.0        |
| C7        | N1        | 1.5000(5)               | 1.5000(5)                  | 0.0     | 0.0        |
| C1        | C2        | 1.3873(4)               | 1.3874(4)                  | 0.2     | 0.0        |

Table S7: Bond length changes for 3-phenylpropylammonium bound to trypsin.

| atom ID 1 | atom ID 2 | bond length in water(Å) | bond length in complex (Å) | z score | percentage |
|-----------|-----------|-------------------------|----------------------------|---------|------------|
| C1        | C3        | 1.3882(4)               | 1.3878(4)                  | 0.7     | 0.0        |
| C6        | C7        | 1.5137(4)               | 1.5145(5)                  | 1.2     | 0.1        |
| C4        | C6        | 1.3878(4)               | 1.3876(4)                  | 0.4     | 0.0        |
| C9        | N1        | 1.5007(5)               | 1.5000(5)                  | 1.1     | 0.0        |
| C3        | C5        | 1.3876(4)               | 1.3878(4)                  | 0.4     | 0.0        |
| C2        | C4        | 1.3877(4)               | 1.3875(4)                  | 0.4     | 0.0        |
| C8        | C9        | 1.5355(5)               | 1.5356(5)                  | 0.2     | 0.0        |
| C5        | C6        | 1.3876(4)               | 1.3877(4)                  | 0.2     | 0.0        |
| C7        | C8        | 1.5362(5)               | 1.5357(5)                  | 0.8     | 0.0        |
| C1        | C2        | 1.3865(4)               | 1.3880(4)                  | 2.9     | 0.1        |

Table S8: Bond length changes for n221 bound to trypsin.

| atom ID 1 | atom ID 2 | bond length in water(Å) | bond length in complex (Å) | z score | percentage |
|-----------|-----------|-------------------------|----------------------------|---------|------------|
| C3        | N1        | 1.3330(4)               | 1.3335(4)                  | 1.0     | 0.0        |
| C6        | C7        | 1.3788(4)               | 1.3786(4)                  | 0.4     | 0.0        |
| C8        | O1        | 1.2142(3)               | 1.2149(3)                  | 1.5     | 0.1        |
| C8        | O2        | 1.2145(3)               | 1.2146(3)                  | 0.2     | 0.0        |
| C7        | C8        | 1.4627(4)               | 1.4636(4)                  | 1.5     | 0.1        |
| C3        | N2        | 1.3462(4)               | 1.3459(4)                  | 0.5     | 0.0        |
| C2        | N2        | 1.3627(4)               | 1.3619(4)                  | 1.5     | 0.1        |
| C5        | C7        | 1.4399(4)               | 1.4394(4)                  | 0.9     | 0.0        |
| C1        | N1        | 1.3925(4)               | 1.3924(4)                  | 0.2     | 0.0        |
| C1        | C2        | 1.3817(4)               | 1.3819(4)                  | 0.4     | 0.0        |
| C4        | C5        | 1.3731(4)               | 1.3727(4)                  | 0.8     | 0.0        |
| C6        | N2        | 1.3698(4)               | 1.3697(4)                  | 0.2     | 0.0        |
| C3        | C4        | 1.4197(4)               | 1.4205(4)                  | 1.5     | 0.1        |

Table S9: Bond length changes for n340 bound to trypsin.

| atom ID 1 | atom ID 2 | bond length in water(Å) | bond length in complex (Å) | z score | percentage |
|-----------|-----------|-------------------------|----------------------------|---------|------------|
| C10       | N2        | 1.3646(4)               | 1.3643(4)                  | 0.6     | 0.0        |
| C6        | C9        | 1.3868(4)               | 1.3870(4)                  | 0.4     | 0.0        |
| C9        | N1        | 1.3512(4)               | 1.3510(4)                  | 0.4     | 0.0        |
| C4        | C9        | 1.3867(4)               | 1.3867(4)                  | 0.0     | 0.0        |
| C2        | C3        | 1.4250(4)               | 1.4254(4)                  | 0.8     | 0.0        |
| C3        | C8        | 1.3708(4)               | 1.3701(3)                  | 1.4     | 0.1        |
| C1        | C4        | 1.3880(4)               | 1.3872(4)                  | 1.6     | 0.1        |
| C1        | C5        | 1.3884(4)               | 1.3879(4)                  | 1.0     | 0.0        |
| C10       | C5        | 1.3892(4)               | 1.3885(4)                  | 1.4     | 0.1        |
| C8        | N1        | 1.3742(4)               | 1.3748(4)                  | 1.1     | 0.0        |
| C7        | N1        | 1.3748(4)               | 1.3750(4)                  | 0.4     | 0.0        |
| C2        | C7        | 1.3705(4)               | 1.3706(4)                  | 0.2     | 0.0        |
| C10       | C6        | 1.3880(4)               | 1.3881(4)                  | 0.2     | 0.0        |

Table S10: Bond length for Vertex molecule 000001 bound to DNA gyrase.

| atom ID 1 | atom ID 2 | bond length in water(Å) | bond length in complex (Å) | z score | percentage |
|-----------|-----------|-------------------------|----------------------------|---------|------------|
| C10       | C11       | 1.387(1)                | 1.381(8)                   | 0.7     | 0.4        |
| C3        | O2        | 1.2140(9)               | 1.208(4)                   | 1.4     | 0.5        |
| C16       | C17       | 1.391(1)                | 1.396(7)                   | 0.8     | 0.4        |
| C5        | C6        | 1.384(1)                | 1.389(7)                   | 0.7     | 0.4        |
| C14       | C15       | 1.388(1)                | 1.379(9)                   | 1.1     | 0.7        |
| O1        | C3        | 1.344(1)                | 1.34(1)                    | 0.0     | 0.0        |
| C17       | C18       | 1.382(1)                | 1.376(8)                   | 0.8     | 0.5        |
| C8        | C9        | 1.340(1)                | 1.34(1)                    | 0.3     | 0.2        |
| C11       | C12       | 1.388(1)                | 1.40(1)                    | 0.7     | 0.6        |
| N1        | C4        | 1.380(1)                | 1.376(7)                   | 0.6     | 0.3        |
| C7        | C16       | 1.398(1)                | 1.407(8)                   | 1.3     | 0.7        |
| C18       | N3        | 1.335(1)                | 1.345(7)                   | 1.5     | 0.7        |
| C13       | C14       | 1.387(1)                | 1.393(5)                   | 1.0     | 0.4        |
| C1        | C2        | 1.536(1)                | 1.545(9)                   | 1.0     | 0.6        |
| C6        | C7        | 1.394(1)                | 1.385(8)                   | 1.0     | 0.6        |
| C2        | O1        | 1.441(2)                | 1.433(8)                   | 0.9     | 0.5        |
| C13       | O3        | 1.359(1)                | 1.360(7)                   | 0.1     | 0.0        |
| C9        | C10       | 1.473(1)                | 1.469(7)                   | 0.5     | 0.2        |
| C3        | N1        | 1.345(1)                | 1.336(9)                   | 1.0     | 0.7        |
| C4        | N3        | 1.389(1)                | 1.39(1)                    | 0.1     | 0.1        |
| C5        | C18       | 1.359(1)                | 1.348(6)                   | 1.9     | 0.8        |
| C7        | C8        | 1.470(1)                | 1.472(9)                   | 0.2     | 0.1        |
| C12       | C13       | 1.388(1)                | 1.388(7)                   | 0.1     | 0.1        |
| C4        | N2        | 1.359(1)                | 1.347(7)                   | 1.9     | 0.9        |
| N2        | C5        | 1.338(1)                | 1.348(8)                   | 1.3     | 0.8        |
| C10       | C15       | 1.386(1)                | 1.394(9)                   | 0.8     | 0.5        |

Table S11: Bond length changes for Vertex molecule 000163 bound to DNA gyrase.

| atom ID 1 | atom ID 2 | bond length in water(Å) | bond length in complex (Å) | z score | percentage |
|-----------|-----------|-------------------------|----------------------------|---------|------------|
| C5        | C10       | 1.359(1)                | 1.362(7)                   | 0.4     | 0.2        |
| C17       | N7        | 1.341(1)                | 1.342(9)                   | 0.2     | 0.1        |
| C19       | C20       | 1.391(1)                | 1.395(7)                   | 0.6     | 0.3        |
| N1        | C3        | 1.348(1)                | 1.348(7)                   | 0.0     | 0.0        |
| C7        | C8        | 1.396(1)                | 1.388(6)                   | 1.2     | 0.5        |
| C17       | C21       | 1.356(1)                | 1.344(6)                   | 2.1     | 0.9        |
| N2        | C4        | 1.382(1)                | 1.376(9)                   | 0.7     | 0.4        |
| N3        | C5        | 1.338(1)                | 1.331(3)                   | 2.0     | 0.5        |
| C14       | C15       | 1.500(1)                | 1.507(9)                   | 0.7     | 0.4        |
| C11       | C12       | 1.387(1)                | 1.382(8)                   | 0.6     | 0.3        |
| C3        | O1        | 1.214(1)                | 1.221(6)                   | 1.2     | 0.6        |
| C18       | C19       | 1.397(1)                | 1.399(7)                   | 0.3     | 0.2        |
| C2        | N1        | 1.462(1)                | 1.46(1)                    | 0.1     | 0.0        |
| C12       | C17       | 1.426(1)                | 1.417(9)                   | 1.0     | 0.6        |
| N5        | C21       | 1.348(1)                | 1.33(1)                    | 1.9     | 1.4        |
| C4        | N4        | 1.386(1)                | 1.391(6)                   | 0.8     | 0.3        |
| C13       | N6        | 1.346(1)                | 1.347(7)                   | 0.1     | 0.1        |
| C6        | C7        | 1.391(1)                | 1.39(1)                    | 0.2     | 0.1        |
| C14       | C16       | 1.498(1)                | 1.503(8)                   | 0.5     | 0.3        |
| N7        | C18       | 1.354(1)                | 1.343(6)                   | 1.6     | 0.8        |
| C9        | C10       | 1.385(1)                | 1.385(8)                   | 0.0     | 0.0        |
| C8        | C9        | 1.390(1)                | 1.402(7)                   | 1.7     | 0.9        |
| C15       | C16       | 1.502(1)                | 1.497(8)                   | 0.5     | 0.3        |
| C4        | N3        | 1.358(1)                | 1.364(5)                   | 1.3     | 0.5        |
| C20       | C21       | 1.378(1)                | 1.39(1)                    | 1.2     | 0.9        |
| C5        | C6        | 1.383(1)                | 1.39(1)                    | 1.0     | 0.7        |
| C1        | C2        | 1.536(1)                | 1.54(1)                    | 0.2     | 0.2        |
| C13       | O2        | 1.214(1)                | 1.201(9)                   | 1.5     | 1.1        |
| C7        | N5        | 1.353(1)                | 1.354(8)                   | 0.2     | 0.1        |
| N5        | C11       | 1.390(1)                | 1.39(1)                    | 0.2     | 0.1        |
| C12       | C13       | 1.463(1)                | 1.46(1)                    | 0.2     | 0.1        |
| C3        | N2        | 1.345(1)                | 1.34(1)                    | 0.6     | 0.5        |
| N6        | C14       | 1.442(1)                | 1.439(8)                   | 0.3     | 0.2        |
| C10       | N4        | 1.334(1)                | 1.322(6)                   | 1.8     | 0.9        |
